# Supplementary material
Source: PubMed Central journal article supplement (PMC3886718)
Supplement: NIHMS536663-supplement-Suppl_Figure_1.pdf [file NIHMS536663-supplement-Suppl_Figure_1.pdf]

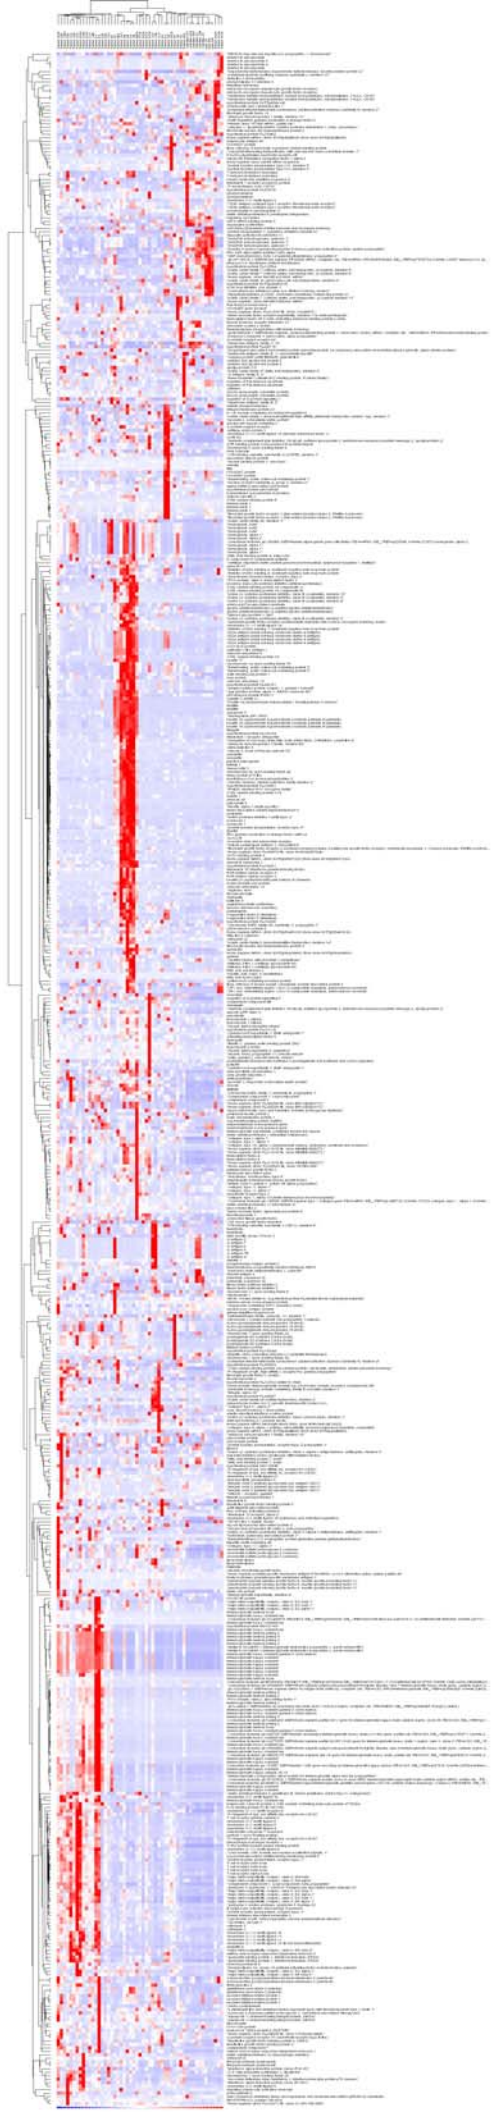

Supplemental Figure 1. Non-supervised hierarchical clustering analysis of melanoma samples. Melanoma biopsies, melanoma cell lines, and primary melanocyte cell lines were analyzed by Affymetrix gene expression profiling and non-supervised hierarchical clustering analysis was performed using dCHIP software. Samples are clustered horizontally and genes are clustered vertically. Red represents higher expression and blue represents lower expression.
